# Supplementary material for: Tissue-specific impact of FADS cluster variants on FADS1 and FADS2 gene expression
Source: PubMed Central journal article supplement (PMC5874031; doi:10.1371/journal.pone.0194610), 2018-03-28

# S1 Figure

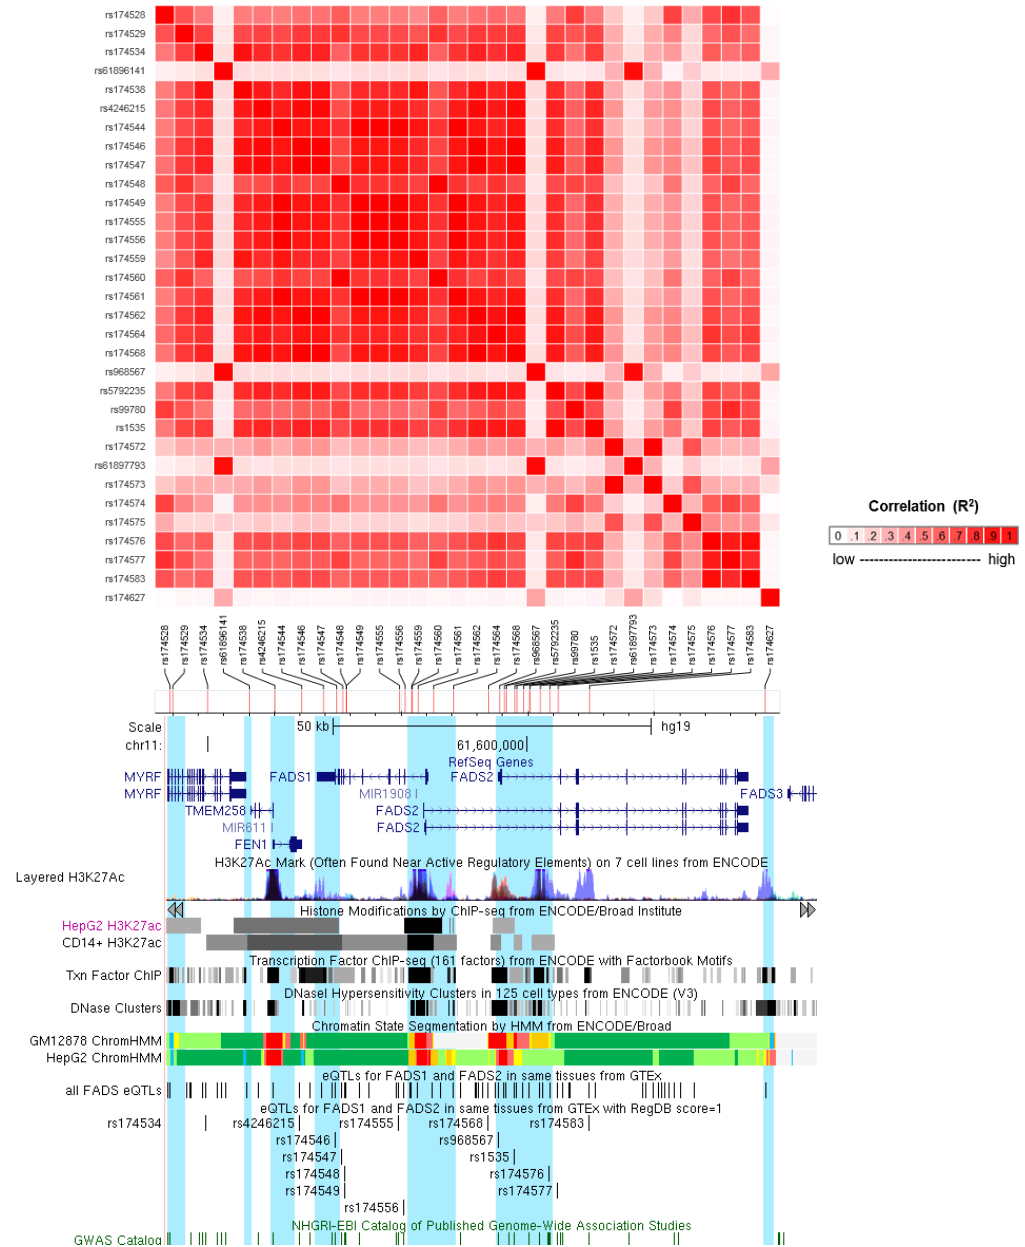

Supplement: pone.0194610.s001.pdf [file pone.0194610.s001.pdf]
